# Supplementary material
Source: PubMed Central journal article supplement (PMC2390679)
Supplement: rsbl20070258s12.pdf [file rsbl20070258s12.pdf]

1. Sue Lewis (ESM 1).doc: Collection and analysis of allopreening behaviour

Allopreening was recorded on real-time video. We describe how the data were collected and analysed to quantify allopreen rate of males and females at study nests.

2. Sue Lewis (ESM 2).doc: Statistical models

Mate and neighbour allopreening rate in relation to long and short term fitness were analysed using linear mixed models. Details of these models are given here.

3. Sue Lewis (ESM 3).avi: The cost of fighting in a colony

This video shows a fight between two neighbouring guillemots on the Isle of May, resulting in an egg being knocked off the nest site and into the sea (QuickTime; 8 MB).

4. Sue Lewis (ESM 4).jpg: Photo of allopreening within a pair

Allopreening within a pair.
